# Supplementary material
Source: publisher figshare collection journal article supplement (https://sage.figshare.com/ndownloader/files/21239829)
Supplement: Supplementary file 1 [file 21239829]

## **Appendix s1 – Topic List**

This Appendix contains the last version of the topic list used in the interviews.

### **Section A. Nurses' knowledge of drug-induced PICC obstruction**

#### 1. General context and current situation

Can you briefly describe your work in department?

What do you think about when you hear the word 'drug-induced PICC obstruction'?

Have you known about the management of drug-induced PICC? Through what ways to understand?

#### 2. Extent of the topic

In your daily practice, how do you understand drug-induced PICC obstruction?

How do you assess the extent of the problem with drug-induced PICC obstruction and its severity?

According to you, what are the most important causes of drug-induced PICC obstruction?

To what extent are you able to make an infusion sequence plan?

What is the main content for determining the infusion sequence?

### **Section B. Nurses' knowledge of management for drug-induced PICC obstruction**

In your daily practice, what is the management of drug-induced PICC obstruction in clinical work at present? Can you tell us something about drug-induced PICC obstruction in this department?

What would help you (or others) to prevent drug-induced PICC obstruction? Have you used the advice provided by Practical Standards for Infusion Therapy in your work?

What was the result of the implementation of these practices?

What would help you (or others) to deal with drug-induced PICC obstruction? Have you used the advice provided by Practical Standards for Infusion Therapy in your work?

What was the result of the implementation of these practices?

**Section C. Others content related to drug-induced PICC obstruction**

What else do you want to say about drug-induced PICC obstruction?

## **Appendix s2**

Colaizzi's<sup>18,19</sup> seven stages:

---

Stage 1: Acquiring a sense of each transcript

Stage 2: Extracting significant statements

Stage 3: Formulation of meanings

Stage 4: Organising formulated meaning into clusters of themes

Stage 5: Exhaustively describing the investigated phenomenon

Stage 6: Describing the fundamental structure of the phenomenon

Stage 7: Returning to the participants

---
